# Supplementary material for: The Effect of an Electronic Passive Prompt Intervention on Prolonged Occupational Sitting and Light-Intensity Physical Activity in Desk-Based Adults Working from Home during COVID-19 in Ireland
Source: MDPI journal article supplement (doi:10.3390/ijerph20136294), 2023-07-04
Supplement: s1 [file s1]

**Supplementary Data File:**

**Journal Title:** The Effect of an Electronic Passive Prompt Intervention on Prolonged Occupational Sitting and Light-Intensity Physical Activity in Desk-Based Adults Working from Home During COVID-19 in Ireland

**Authors:** Aidan J. Buffey <sup>1,2,\*</sup>, Gráinne Hayes <sup>1,2</sup>, Brian P. Carson <sup>1,2,†</sup> and Alan E. Donnelly <sup>1,2,†</sup>

**Affiliations:**

<sup>1</sup> Department of Physical Education and Sport Science, University of Limerick Faculty of Education and Health Sciences, Limerick, Ireland

<sup>2</sup> Physical Activity for Health Research Cluster, Health Research Institute (HRI), University of Limerick, Limerick, Ireland

<sup>#</sup> Denotes that both authors contributed equally and are joint senior authors.

\* Correspondence: aidan.buffey@ul.ie

**Supplementary Table S1.** This table presents the sedentary behaviour patterns during the 24-hour period throughout the baseline (Week 1-3) and intervention (Week 4-6). Presented as Mean  $\pm$  Standard Error (95% Confidence Intervals).

| Total 24-Hour<br>Sedentary<br>Behaviours<br>Patterns | Baseline                              | Intervention                           | Mean Change                            | <i>p</i> | <i>d</i> |
|------------------------------------------------------|---------------------------------------|----------------------------------------|----------------------------------------|----------|----------|
| Number of SB > 40<br>(Mins)                          | 4.84 $\pm$ 0.27<br>(4.30-5.39)        | 4.50 $\pm$ 0.29<br>(3.91-5.09)         | -0.34 $\pm$ 0.15<br>(-0.60--0.05)      | 0.026    | 0.171    |
| Time in SB<br>> 40 (Mins)                            | 368.86 $\pm$ 25.60<br>(316.33-421.38) | 324.20 $\pm$ 25.27<br>(272.34-376.05)  | -44.66 $\pm$ 11.95 (-<br>69.17--20.14) | < 0.001  | 0.341    |
| Number of SB > 60<br>(Mins)                          | 2.66 $\pm$ 0.22<br>(2.20-3.11)        | 2.24 $\pm$ 0.21<br>(1.82-2.66)         | -0.42 $\pm$ 0.14<br>(-0.70--0.14)      | 0.005    | 0.254    |
| Time in SB<br>> 60 (Mins)                            | 261.27 $\pm$ 24.52<br>(210.96-311.57) | 214.607 $\pm$ 22.40<br>(168.65-260.56) | -46.67 $\pm$ 13.74 (-<br>74.85--18.47) | 0.002    | 0.299    |
| Number of SB > 90<br>(Mins)                          | 1.21 $\pm$ 0.14<br>(0.92-1.50)        | 0.96 $\pm$ 0.12<br>(0.71-1.22)         | -0.25 $\pm$ 0.08<br>(-0.41--0.09)      | 0.004    | 0.265    |
| Time in SB<br>> 90 (Mins)                            | 155.97 $\pm$ 19.93<br>(115.07-196.86) | 121.80 $\pm$ 16.94<br>(87.05-156.56)   | -34.16 $\pm$ 11.28 (-<br>57.31--11.02) | 0.005    | 0.254    |
| Total Number of<br>SB                                | 47.03 $\pm$ 3.05<br>(40.76-53.29)     | 48.43 $\pm$ 3.15<br>(41.97-54.90)      | +1.41 $\pm$ 1.07<br>(-0.79-3.60)       | 0.200    | 0.060    |
| Total Time Spent<br>in SB (Mins)                     | 672.56 $\pm$ 18.62<br>(634.37-710.76) | 640.44 $\pm$ 17.02<br>(605.52-675.36)  | -32.13 $\pm$ 9.35<br>(-51.30--12.95)   | 0.002    | 0.304    |
| Total Sedentary<br>Waking Hours                      | 11.21 $\pm$ 0.31<br>(10.57-11.85)     | 10.67 $\pm$ 0.28<br>(10.57-11.85)      | -0.54 $\pm$ 0.16<br>(-0.86--0.22)      | 0.002    | 0.305    |

Abbreviations: SB; sedentary bouts. **Bold** indicates that a significant change was found for the reported outcome variable ( $p < 0.05$ ).

**Supplementary Table S2.** This table presents the sedentary behaviour patterns during the non-work (leisure) hours throughout the baseline (Week 1-3) and intervention (Week 4-6). Presented as Mean  $\pm$  Standard Error (95% Confidence Intervals).

| Leisure Sedentary Behaviours Patterns | Baseline                                          | Intervention                                      | Mean Change                                      | <i>p</i>     | <i>d</i>     |
|---------------------------------------|---------------------------------------------------|---------------------------------------------------|--------------------------------------------------|--------------|--------------|
| Number of SB > 40 (Mins)              | 1.91 $\pm$ 0.14<br>(1.61-2.20)                    | 1.71 $\pm$ 0.16<br>(1.38-2.04)                    | -0.19 $\pm$ 0.11 (-0.42-0.04)                    | 0.102        | 0.096        |
| Time in SB > 40 (Mins)                | 141.97 $\pm$ 12.53<br>(116.25-167.68)             | 126.55 $\pm$ 13.00<br>(99.87-153.24)              | -15.41 $\pm$ 8.97 (-33.81-2.99)                  | 0.097        | 0.099        |
| <b>Number of SB &gt; 60 (Mins)</b>    | <b>1.02 <math>\pm</math> 0.10<br/>(0.82-1.22)</b> | <b>0.86 <math>\pm</math> 0.10<br/>(0.66-1.06)</b> | <b>-0.15 <math>\pm</math> 0.07 (-0.29--0.01)</b> | <b>0.032</b> | <b>0.159</b> |
| Time in SB > 60 (Mins)                | 98.38 $\pm$ 11.18<br>(75.44-121.33)               | 84.91 $\pm$ 10.61<br>(63.13-106.69)               | -13.47 $\pm$ 7.35 (-28.54-1.60)                  | 0.078        | 0.111        |
| Number of SB > 90 (Mins)              | 0.43 $\pm$ 0.06<br>(0.30-0.57)                    | 0.41 $\pm$ 0.07<br>(0.28-0.55)                    | -0.02 $\pm$ 0.05 (-0.13-0.09)                    | 0.681        | 0.006        |
| Time in SB > 90 (Mins)                | 55.72 $\pm$ 9.50<br>(36.23-75.20)                 | 51.92 $\pm$ 8.89<br>(33.68-70.16)                 | -3.80 $\pm$ 7.38 (-18.93-11.34)                  | 0.611        | 0.010        |
| Total Number of SB                    | 22.84 $\pm$ 1.58<br>(19.60-26.08)                 | 23.24 $\pm$ 1.54<br>(20.09-26.39)                 | +0.40 $\pm$ 0.63 (-0.89-1.69)                    | 0.528        | 0.015        |
| Total Time Spent in SB (Mins)         | 289.51 $\pm$ 10.53<br>(267.91-311.12)             | 275.09 $\pm$ 12.27<br>(249.91-300.27)             | -14.42 $\pm$ 8.99 (-32.88-4.03)                  | 0.120        | 0.087        |
| Total Sedentary Leisure Waking Hours  | 4.83 $\pm$ 0.18<br>(4.47-5.19)                    | 4.58 $\pm$ 0.21<br>(4.17-5.00)                    | -0.24 $\pm$ 0.15 (-0.55-0.07)                    | 0.119        | 0.087        |

Abbreviations: SB; sedentary bouts. **Bold** indicates that a significant change was found for the reported outcome variable ( $p < 0.05$ ).
